# Supplementary material for: Genetic Surveillance of SARS-CoV-2 Mpro Reveals High Sequence and Structural Conservation Prior to the Introduction of Protease Inhibitor Paxlovid
Source: PubMed Central journal article supplement (PMC9426535; doi:10.1128/mbio.00869-22), 2022-07-13
Supplement: mbio.00869-22-s0003.pdf [file mbio.00869-22-s0003.pdf]

**Table S1. List of CoV protease structures in the homology analysis.**

| <b>Protein</b>                             | <b>Group</b> | <b>Pdb ID</b> | <b>Ligand</b> |
|--------------------------------------------|--------------|---------------|---------------|
| SARS-CoV-2 main protease                   | beta         | 7RFW          | PF-07311332   |
| SARS-CoV-2 main protease                   | beta         | 6LU7          | PRD_002214    |
| SARS-CoV-1 main protease                   | beta         | 2AMQ          | PRD_002214    |
| MERS-CoV                                   | beta         | 4RSP          | PRD_002174    |
| MHV (Murine hepatitis virus)               | beta         | 6JIJ          | PRD_002214    |
| HKU1                                       | beta         | 3D23          | PRD_002214    |
| HKU4 (Tylonycteris bat coronavirus)        | beta         | 4YOG          | 4F5           |
| 229E                                       | alpha        | 2ZU2          | apo           |
| PEDV (Porcine epidemic diarrhea virus)     | alpha        | 5GWZ          | PRD_002214    |
| FIPV (Feline infectious peritonitis virus) | alpha        | 5EU8          | PRD_002214    |
| NL63                                       | alpha        | 5GWY          | PRD_002214    |
| IBV (infectious bronchitis virus)          | gamma        | 2Q6F          | PRD_002214    |
