# Supplementary material for: Genetic Surveillance of SARS-CoV-2 Mpro Reveals High Sequence and Structural Conservation Prior to the Introduction of Protease Inhibitor Paxlovid
Source: PubMed Central journal article supplement (PMC9426535; doi:10.1128/mbio.00869-22), 2022-07-13
Supplement: mbio.00869-22-s0004.pdf [file mbio.00869-22-s0004.pdf]

**Table S2. Geographic and lineage distribution of the most prevalent M<sup>PRO</sup> mutations (*n* > 5,000).**

| Mutations | Population Frequency (%) | Number of Countries | Number of Lineages | Top Countries                                                                 | Top Lineages                                                                                  |
|-----------|--------------------------|---------------------|--------------------|-------------------------------------------------------------------------------|-----------------------------------------------------------------------------------------------|
| P132H     | 6.15                     | 97                  | 54                 | UK (44.6%), US (32%), Denmark (6.7%)                                          | BA.1 (98.1%)                                                                                  |
| K90R      | 1.987                    | 165                 | 549                | US (26.3%), UK (10.2%), Denmark (9.8%)                                        | B.1.351 (23.1%), B.1.617.2 (15%), B.1.1.7 (12.1%), AY.4 (10.4%)                               |
| L89F      | 1.857                    | 90                  | 149                | US (92.7%)                                                                    | B.1.2 (91.3%)                                                                                 |
| P108S     | 0.381                    | 84                  | 247                | Japan (54.9%), US (15%), Switzerland (7.2%), UK (5.7%)                        | B.1.1.284 (52.9%), B.1.1.7 (15.1%), B.1.617.2 (7.9%)                                          |
| A260V     | 0.312                    | 90                  | 249                | US (29.9%), UK (22.3%), Germany (8.4%), Japan (5.8%)                          | B.1.617.2 (14.9%), AY.4 (14%), B.1.1.7 (12.3%), AY.44 (11.9%), AY.122 (10.4%), B.1.177 (5.2%) |
| K88R      | 0.238                    | 62                  | 149                | UK (78.3%), US (7%)                                                           | AY.4 (75.7%), B.1.617.2 (5.3)                                                                 |
| G15S      | 0.23                     | 108                 | 124                | UK (26.2%), Peru (10.5%), US (8.1%)                                           | B.1.1.1 (43.3%), C.37 (10%), C.36 (8.4%), C.36.3 (5.7%)                                       |
| V212F     | 0.174                    | 39                  | 62                 | Denmark (86.3%)                                                               | AY.4 (74.8%), AY.4.6 (12.1%), B.1.367 (8.6%)                                                  |
| I259L     | 0.137                    | 17                  | 46                 | US (84.7%), UK (13.9%)                                                        | AY.3 (95.8%)                                                                                  |
| L220F     | 0.134                    | 49                  | 104                | US (49.2%), Denmark (37.5%)                                                   | AY.25 (31.1%), B.1.617.2 (24.1%), AY.122 (23%)                                                |
| P132L     | 0.133                    | 72                  | 174                | US (19.7%), UK (16.8%), Germany (14.2%), Netherlands (12.6%), Denmark (12.2%) | B.1.617.2 (18.4%), AY.9 (12.8%), AY.66 (8.1%), AY.9.2 (8%), AY.4 (7.8%), B.1.1.7 (5%)         |
| V73I      | 0.132                    | 31                  | 55                 | US (98%)                                                                      | B.1.617.2 (58.6%), AY.118 (24.2%), AY.4 (8.4%)                                                |
| V157L     | 0.128                    | 59                  | 126                | Denmark (52.1%), US (11.5%), UK (9.6%), Canada (8.9%), Germany (5.7%)         | AY.43 (52.6%), AY.4 (8.8%), B.1.1 (8.2%), AY.4.3 (5.4%)                                       |
| L75F      | 0.116                    | 78                  | 203                | US (36.9%), UK (9.6%), Switzerland (7.2%), Germany (6.8%)                     | B.1.1.7 (35.6%), B.1.617.2 (9.6%), AY.3 (6.9%), B.1.526 (6.2%)                                |
| T196M     | 0.112                    | 52                  | 110                | US (83%)                                                                      | B.1.429 (37.4%), AY.44 (22.6%), B.1.234 (12%), B.1.617.2 (8.2%)                               |
| A191V     | 0.111                    | 82                  | 245                | US (38.8%), UK (30.6%)                                                        | AY.4 (13.6%), B.1.617.2 (9.9%), B.1.177.20 (6.2%), AY.103 (5.9%), B.1.1.7 (5.8%), AY.25 (5%)  |
| A129V     | 0.11                     | 71                  | 177                | UK (44.9%), US (28.2%)                                                        | AY.4 (33.4%), B.1.617.2 (19.1%), AY.25 (5.6%), B.1.1.7 (5.1%)                                 |
