# Supplementary material for: Genetic Surveillance of SARS-CoV-2 Mpro Reveals High Sequence and Structural Conservation Prior to the Introduction of Protease Inhibitor Paxlovid
Source: PubMed Central journal article supplement (PMC9426535; doi:10.1128/mbio.00869-22), 2022-07-13
Supplement: mbio.00869-22-s0005.pdf [file mbio.00869-22-s0005.pdf]

**Table S3. M<sup>pro</sup> cleavage sites and coordinates across ORF1ab.<sup>a</sup>**

| Proteins |          | Cleavage Sites | ORF1ab Coordinates |
|----------|----------|----------------|--------------------|
| ORF1     | ORF2     |                |                    |
| nsp4     | nsp5     | SAVLQ↓SGFRK    | 3259 .. 3268       |
| nsp5     | nsp6     | GVTFQ↓SAVKR    | 3565 .. 3574       |
| nsp6     | nsp7     | VATVQ↓SKMSD    | 3855 .. 3864       |
| nsp7     | nsp8     | RATLQ↓AIASE    | 3938 .. 3947       |
| nsp8     | nsp9     | AVKLQ↓NNELS    | 4136 .. 4145       |
| nsp9     | nsp10    | TVRLQ↓AGNAT    | 4249 .. 4258       |
| nsp10    | nsp11/12 | EPMLQ↓SADAQ    | 4388 .. 4397       |
| nsp12    | nsp13    | HTVLQ↓AVGAC    | 5320 .. 5329       |
| nsp13    | nsp14    | VATLQ↓AENVT    | 5921 .. 5930       |
| nsp14    | nsp15    | FTRLQ↓SLENV    | 6448 .. 6457       |
| nsp15    | nsp16    | YPKLQ↓SSQAW    | 6794 .. 6803       |

<sup>a</sup>from the SARS-CoV-2 reference sequence (NC\_045512.2, isolate Wuhan-hu-1)
